# Supplementary material
Source: bioRxiv or medRxiv preprint supplement (https://www.biorxiv.org/content/biorxiv/early/2019/11/27/857037/DC1/embed/media-1.pdf)

**Supplementary Figure: S1. A schematic representation of the plausible molecular events depicting the integration of apoptosis resistance and proliferation under the regulatory control of DDR2 in cardiac fibroblasts.**

**A**

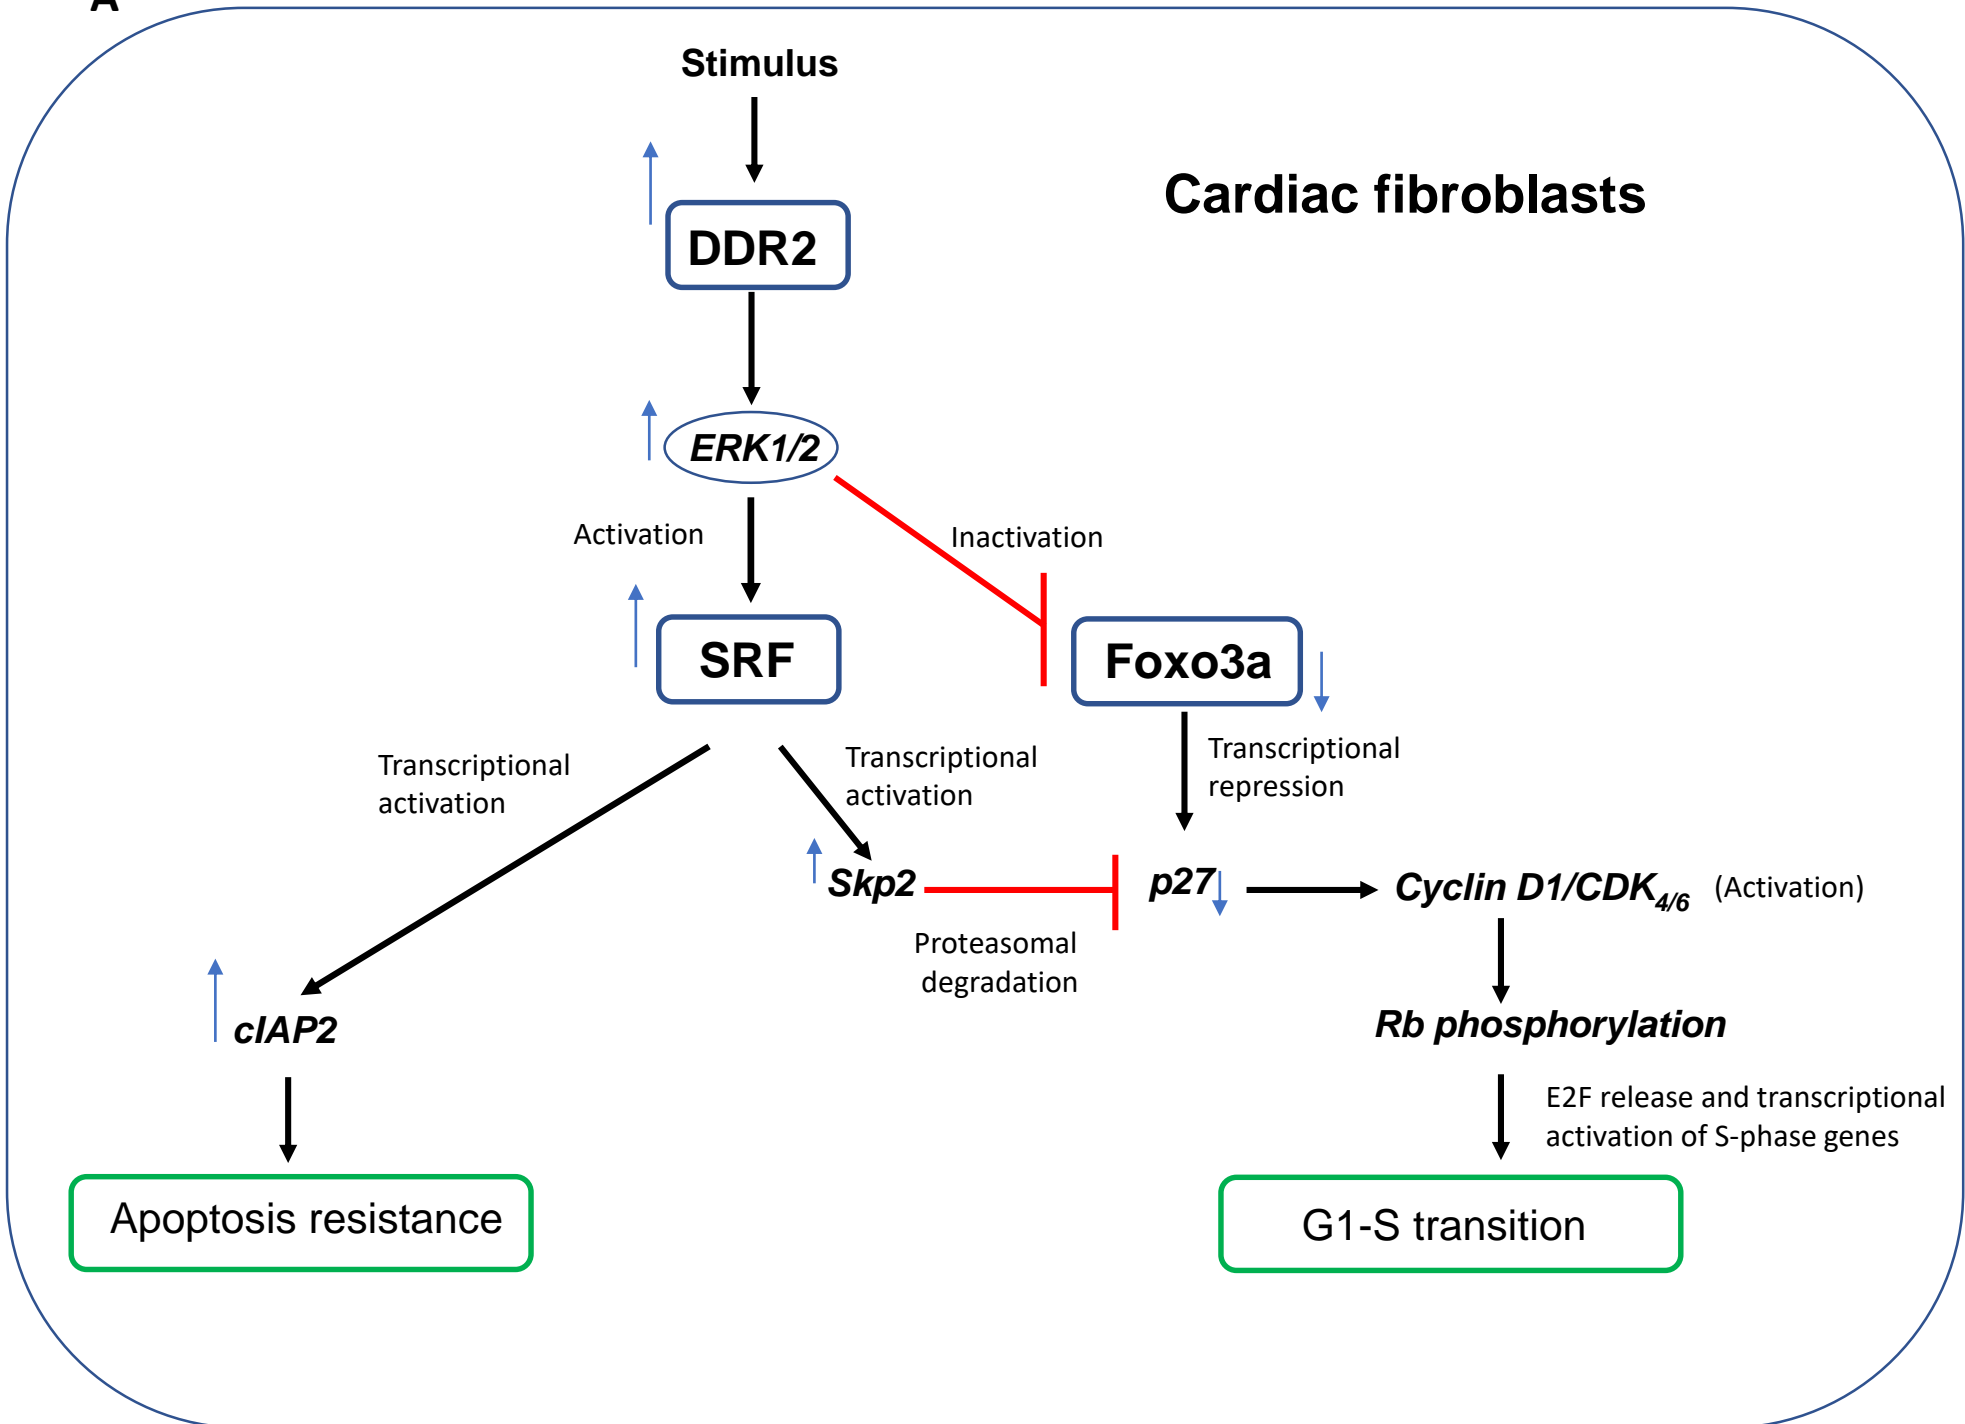

Supplement: Supplementary file [file media-1.pdf]
